# Supplementary material for: Hematological disorders after salvage PARPi treatment for ovarian cancer: Cytogenetic and molecular defects and clinical outcomes
Source: PubMed Central journal article supplement — Int J Cancer. 2022 Jul 2;151(10):1791–803. doi: 10.1002/ijc.34162 (PMC9796966; doi:10.1002/ijc.34162), 2022-07-02
Supplement: IJC-151-1791-s001.pdf [file IJC-151-1791-s001.pdf]

# **Hematological disorders after salvage PARPi treatment for ovarian cancer: cytogenetic and molecular defects and clinical outcomes**

*Elisabetta Todisco, Federica Gigli, Chiara Ronchini, Viviana Amato, Simona Sammassimo, Rocco Pastano, Gabriella Parma, Maria Teresa Lapresa, Francesco Bertolini, Chiara Corsini, Giuliana Gregato, Claudia Poletti, Pier Giuseppe Pelicci, Myriam Alcalay, Nicoletta Colombo, Corrado Tarella*

## **Table of contents**

### **Supplementary Materials and Methods:**

Ion Torrent Sequencing with the custom Myelo-panel page 2

### **Supplementary Tables:**

Table S1: List of genes included in the Oncomine Myeloid Research Assay page 3

Table S2: List of genes and pharmacogenomics single nucleotide polymorphisms (SNPs) included in our custom Myelo Panel page 4-5

Table S3: Sequencing parameters for Oncomine Myeloid Research Assay page 6

Table S4: Sequencing parameters for Myelo Panel page 7

## **Supplementary Materials and Methods**

### **Ion Torrent Sequencing with the custom Myelo-panel**

Targeted capture was carried out according to the manufacturer's protocols using the AmpliSeq kit with a custom panel, called the Myelo-panel, which analyzes 255 cancer-predisposing genes, as described in the main manuscript. Sequencing was performed with the Ion S5 system (ThermoFisher Scientific). Our sequencing libraries have a median read length of 215 bps.

Ion Torrent sequencing Variant analysis was performed with IonReporter software (ThermoFisher Scientific).

For identification of somatic variants from peripheral blood cells, buccal DNA samples were used as normal reference for each patient in order to subtract each individual germline variants. Moreover, we selected: i) variants in exonic regions of the genome and affecting the coding sequence: non-synonymous, stop-gain and stop/start loss SNVs, frameshift Indels; ii) variants with VAF of the alternative allele <40%; iii) finally, in order to filter for germline polymorphisms, we removed any variant reported in any population database (ESP6500, ExAC, gnomAD, 1000 Genomes Phase 3, dbSNP) with a frequency >0.005.

For identification of germline variants from buccal DNA, we selected: i) variants in exonic regions of the genome and affecting the coding sequence: non-synonymous, stop-gain and stop/start loss SNVs, frameshift Indels; ii) we select variants with allelic depth (AD, reads supporting the alternative allele)  $\geq 5$  reads and with VAF of the alternative allele  $\geq 20\%$ ; iii) finally, in order to filter for germline polymorphisms, we removed any variant reported in any population database (ESP6500, ExAC, gnomAD, 1000 Genomes Phase 3, dbSNP) with a frequency >0.005.

Identified variants were annotated in terms of pathogenicity, using different computational tools, including ClinVar, Varsome and RENOVO.

## Supplementary Tables

**Table S1. List of genes included in the Oncomine Myeloid Research Assay**

| Hotspot genes (23) |        | Full genes (17) |       | Fusion driver genes (29) |             |        | Expression genes (5) | Expression control genes (5) |
|--------------------|--------|-----------------|-------|--------------------------|-------------|--------|----------------------|------------------------------|
| ABL1               | KRAS   | ASXL1           | PRPF8 | ABL1                     | HMGA2       | NUP214 | BAALC                | EIF2B1                       |
| BRAF               | MPL    | BCOR            | RB1   | ALK                      | JAK2        | PDGFRA | MECOM                | FBXW2                        |
| CBL                | MYD88  | CALR            | RUNX1 | BCL2                     | KMT2A (MLL) | PDGFRB | MYC                  | PSMB2                        |
| CSF3R              | NPM1   | CEBPA           | SH2B3 | BRAF                     | MECOM       | RARA   | SMC1A                | PUM1                         |
| FLT3               | NRAS   | ETV6            | STAG2 | CCND1                    | MET         | RBM15  | WT1                  | TRIM27                       |
| GATA2              | PTPN11 | EZH2            | TET2  | CREBBP                   | MLLT10      | RUNX1  |                      |                              |
| HRAS               | SETBP1 | IKZF1           | TP53  | EGFR                     | MLLT3       | TCF3   |                      |                              |
| IDH1               | SF3B1  | NF1             | ZRSR2 | ETV6                     | MYBL1       | TFE3   |                      |                              |
| IDH2               | SRSF2  | PHF6            |       | FGFR1                    | MYH11       |        |                      |                              |
| JAK2               | U2AF1  |                 |       | FGFR2                    | NTRK3       |        |                      |                              |
| KIT                | WT1    |                 |       | FUS                      |             |        |                      |                              |
| DNMT3A             |        |                 |       |                          |             |        |                      |                              |

**Table S2. List of genes and pharmacogenomics single nucleotide polymorphisms (SNPs) included in our custom Myelo Panel**

|                     |                     |                |                 |                      |                |                 |                |
|---------------------|---------------------|----------------|-----------------|----------------------|----------------|-----------------|----------------|
| <i>ABCB7</i>        | <i>CCND1</i>        | <i>ERCC2</i>   | <i>GNA11</i>    | <i>MAPK8</i>         | <i>PARN</i>    | <i>REV7</i>     | <i>SMARCB1</i> |
| <i>ABL1</i>         | <i>CCND2</i>        | <i>ERCC3</i>   | <i>GNAQ</i>     | <i>MASTL</i>         | <i>PAX5</i>    | <i>RFWD3</i>    | <i>SMC1A</i>   |
| <i>ABL2</i>         | <i>CCND3</i>        | <i>ERCC4</i>   | <i>GP1BA</i>    | <i>MDM2</i>          | <i>PDGFB</i>   | <i>RICTOR</i>   | <i>SMC3</i>    |
| <i>ACBD5</i>        | <i>CCNE1</i>        | <i>ERCC6L2</i> | <i>HAX1</i>     | <i>MEF2B</i>         | <i>PDGFRA</i>  | <i>ROS1</i>     | <i>SMO</i>     |
| <i>ACD</i>          | <i>CDAN1</i>        | <i>ESR1</i>    | <i>HDAC9</i>    | <i>MEF2BNB-MEF2B</i> | <i>PDGFRB</i>  | <i>RPL11</i>    | <i>SMOX</i>    |
| <i>AK2</i>          | <i>CDK4</i>         | <i>ETV6</i>    | <i>HGF</i>      | <i>MET</i>           | <i>PDSS2</i>   | <i>RPL15</i>    | <i>SRC</i>     |
| <i>AKR1B1</i>       | <i>CDK6</i>         | <i>EZH2</i>    | <i>HNRNP</i>    | <i>MGMT</i>          | <i>PGF</i>     | <i>RPL23</i>    | <i>SRP72</i>   |
| <i>AKT1</i>         | <i>CDKN1B</i>       | <i>FANCA</i>   | <i>HOXA11</i>   | <i>MIR142</i>        | <i>PGR</i>     | <i>RPL26</i>    | <i>SRSF2</i>   |
| <i>AKT2</i>         | <i>CDKN2A</i>       | <i>FANCB</i>   | <i>HRAS</i>     | <i>MITF</i>          | <i>PHF6</i>    | <i>RPL27</i>    | <i>STAG2</i>   |
| <i>AKT3</i>         | <i>CDKN2B</i>       | <i>FANCC</i>   | <i>HSP90AA1</i> | <i>MLH1</i>          | <i>PIK3C2B</i> | <i>RPL31</i>    | <i>STK11</i>   |
| <i>ALAS2</i>        | <i>CDKN2C</i>       | <i>FANCD2</i>  | <i>ID3</i>      | <i>MMP2</i>          | <i>PIK3CA</i>  | <i>RPL35A</i>   | <i>STK4</i>    |
| <i>ALK</i>          | <i>CEBPA</i>        | <i>FANCE</i>   | <i>IDH1</i>     | <i>MPL</i>           | <i>PIK3CB</i>  | <i>RPL36</i>    | <i>SYK</i>     |
| <i>ANKRD26</i>      | <i>CHEK2</i>        | <i>FANCF</i>   | <i>IDH2</i>     | <i>MSH2</i>          | <i>PIK3CD</i>  | <i>RPL4</i>     | <i>TAOK1</i>   |
| <i>AP3B1</i>        | <i>CHEK2 (CHK2)</i> | <i>FANCG</i>   | <i>IGF1R</i>    | <i>MSH6</i>          | <i>PIK3R1</i>  | <i>RPL5</i>     | <i>TAOK2</i>   |
| <i>APC</i>          | <i>CREBBP</i>       | <i>FANCI</i>   | <i>IGF2</i>     | <i>MST1R</i>         | <i>PIK3R2</i>  | <i>RPS10</i>    | <i>TAZ</i>     |
| <i>AR</i>           | <i>CSF1R</i>        | <i>FANCL</i>   | <i>IKZF1</i>    | <i>MTOR</i>          | <i>PIP5K1A</i> | <i>RPS15</i>    | <i>TCIRG1</i>  |
| <i>ARAF</i>         | <i>CSF3R</i>        | <i>FANCM</i>   | <i>JAGN1</i>    | <i>MXRA5</i>         | <i>PLCG2</i>   | <i>RPS17</i>    | <i>TEK</i>     |
| <i>ASXL1</i>        | <i>CTC1</i>         | <i>FANCP</i>   | <i>JAK1</i>     | <i>MYC</i>           | <i>PML</i>     | <i>RPS19</i>    | <i>TERC</i>    |
| <i>ATG2B/GSKIP</i>  | <i>CTNNB1</i>       | <i>FANCO</i>   | <i>JAK2</i>     | <i>MYCN</i>          | <i>PMS2</i>    | <i>RPS24</i>    | <i>TERT</i>    |
| <i>ATM</i>          | <i>CXCR4</i>        | <i>FBXW7</i>   | <i>JAK3</i>     | <i>MYD88</i>         | <i>POT1</i>    | <i>RPS26</i>    | <i>TET2</i>    |
| <i>ATR</i>          | <i>DDR1</i>         | <i>FGF3</i>    | <i>KDR</i>      | <i>MYH9</i>          | <i>PRKCZ</i>   | <i>RPS27</i>    | <i>TINF2</i>   |
| <i>AURKA</i>        | <i>DDR2</i>         | <i>FGF4</i>    | <i>KIT</i>      | <i>NAF1</i>          | <i>PTCH1</i>   | <i>RPS27A</i>   | <i>TOP2A</i>   |
| <i>AURKB</i>        | <i>DDX41</i>        | <i>FGFR1</i>   | <i>KLF1</i>     | <i>NBN (NBS1)</i>    | <i>PTEN</i>    | <i>RPS28</i>    | <i>TP53</i>    |
| <i>AURKC</i>        | <i>DKC1</i>         | <i>FGFR2</i>   | <i>KMT2A</i>    | <i>NCOR2</i>         | <i>PTPDC1</i>  | <i>RPS29</i>    | <i>TSC1</i>    |
| <i>BAP1</i>         | <i>DNAJC21</i>      | <i>FGFR3</i>   | <i>KMT2D</i>    | <i>NF1</i>           | <i>PTPN11</i>  | <i>RPS7</i>     | <i>TSC2</i>    |
| <i>BCL2</i>         | <i>DNMT1</i>        | <i>FGFR4</i>   | <i>KRAS</i>     | <i>NF2</i>           | <i>PUS1</i>    | <i>RTEL1</i>    | <i>TYK2</i>    |
| <i>BCOR</i>         | <i>DNMT3A</i>       | <i>FH</i>      | <i>LAMTOR</i>   | <i>NHP2</i>          | <i>RAB27A</i>  | <i>RUNX1</i>    | <i>U2AF1</i>   |
| <i>BCR</i>          | <i>DOT1L</i>        | <i>FKBP5</i>   | <i>LCK</i>      | <i>NOP10</i>         | <i>RAC1</i>    | <i>SAMD9</i>    | <i>UBE2T</i>   |
| <i>BLM (RECQL3)</i> | <i>EGFR</i>         | <i>FLCN</i>    | <i>LIG4</i>     | <i>NOTCH1</i>        | <i>RAC2</i>    | <i>SAMD9L</i>   | <i>USB1</i>    |
| <i>BRAF</i>         | <i>ELANE</i>        | <i>FLT1</i>    | <i>LYN</i>      | <i>NOTCH2</i>        | <i>RAD21</i>   | <i>SBDS</i>     | <i>VEGFA</i>   |
| <i>BRCA1</i>        | <i>EPCAM</i>        | <i>FLT3</i>    | <i>LYST</i>     | <i>NOTCH3</i>        | <i>RAD50</i>   | <i>SEC23B</i>   | <i>VEGFB</i>   |
| <i>BRCA2</i>        | <i>EPHA1</i>        | <i>FLT4</i>    | <i>MAP2K1</i>   | <i>NOTCH4</i>        | <i>RAD51</i>   | <i>SF3B1</i>    | <i>VPS13B</i>  |
| <i>BRIP1</i>        | <i>EPHA2</i>        | <i>FUS</i>     | <i>MAP2K2</i>   | <i>NPM1</i>          | <i>RAD51C</i>  | <i>SF3B2</i>    | <i>VPS45</i>   |
| <i>BTK</i>          | <i>EPHA3</i>        | <i>FYN</i>     | <i>MAP2K4</i>   | <i>NRAS</i>          | <i>RAF1</i>    | <i>SH2B3</i>    | <i>WAS</i>     |
| <i>C15orf41</i>     | <i>EPHA4</i>        | <i>G6PC3</i>   | <i>MAP3K1</i>   | <i>NTRK1</i>         | <i>RARA</i>    | <i>SLC19A2</i>  | <i>WRAP53</i>  |
| <i>CALR</i>         | <i>EPHB2</i>        | <i>GATA1</i>   | <i>MAP3K11</i>  | <i>NTRK2</i>         | <i>RBBP6</i>   | <i>SLC25A38</i> | <i>WT1</i>     |
| <i>CBBF</i>         | <i>ERBB2</i>        | <i>GATA2</i>   | <i>MAP3K4</i>   | <i>NTRK3</i>         | <i>RBM8A</i>   | <i>SLC37A4</i>  | <i>XRCC2</i>   |
| <i>CBL</i>          | <i>ERBB3</i>        | <i>GFI1</i>    | <i>MAP4K1</i>   | <i>PALB2</i>         | <i>RECQL</i>   | <i>SLTM</i>     | <i>YES1</i>    |

| <i>CBX7</i>       | <i>ERBB4</i>      | <i>GLRX5</i>      | <i>MAPK1</i>       | <i>PAPD5</i>      | <i>RET</i>        | <i>SLX4</i>       | <i>rs1045642</i>   |
|-------------------|-------------------|-------------------|--------------------|-------------------|-------------------|-------------------|--------------------|
| <i>rs2032582</i>  | <i>rs9024</i>     | <i>rs11572080</i> | <i>rs121434569</i> | <i>rs1138272</i>  | <i>rs12948783</i> | <i>rs10981694</i> | <i>rs6755571</i>   |
| <i>rs1128503</i>  | <i>rs8133052</i>  | <i>rs3892097</i>  | <i>rs11568315</i>  | <i>rs9274407</i>  | <i>rs1042858</i>  | <i>rs4795541</i>  | <i>rs6431558</i>   |
| <i>rs246240</i>   | <i>rs9344</i>     | <i>rs2070673</i>  | <i>rs2227983</i>   | <i>rs12654264</i> | <i>rs9937</i>     | <i>rs4149015</i>  | <i>rs3832043</i>   |
| <i>rs3740066</i>  | <i>rs2072671</i>  | <i>rs2740574</i>  | <i>rs712829</i>    | <i>rs17583889</i> | <i>rs2898950</i>  | <i>rs4149056</i>  | <i>rs1801019</i>   |
| <i>rs717620</i>   | <i>rs532545</i>   | <i>rs35599367</i> | <i>rs2234922</i>   | <i>rs430397</i>   | <i>rs1561876</i>  | <i>rs2306283</i>  | <i>rs25487</i>     |
| <i>rs2273697</i>  | <i>rs602950</i>   | <i>rs776746</i>   | <i>rs1136201</i>   | <i>rs6313</i>     | <i>rs1042919</i>  | <i>rs11045585</i> | <i>rs1382368</i>   |
| <i>rs1051640</i>  | <i>rs60369023</i> | <i>rs17574269</i> | <i>rs11615</i>     | <i>rs2075252</i>  | <i>rs1130609</i>  | <i>rs4880</i>     | <i>rs8060157</i>   |
| <i>rs9561778</i>  | <i>rs3215400</i>  | <i>rs2297595</i>  | <i>rs3212986</i>   | <i>rs1801133</i>  | <i>rs5030743</i>  | <i>rs2302948</i>  | <i>rs20572</i>     |
| <i>rs16950650</i> | <i>rs4646316</i>  | <i>rs1801159</i>  | <i>rs13181</i>     | <i>rs1801131</i>  | <i>rs1265138</i>  | <i>rs10426377</i> | <i>rs4244285</i>   |
| <i>rs2231137</i>  | <i>rs9332377</i>  | <i>rs17376848</i> | <i>rs2207396</i>   | <i>rs1799983</i>  | <i>rs1979277</i>  | <i>rs1042522</i>  | <i>rs121434568</i> |
| <i>rs2494752</i>  | <i>rs4646</i>     | <i>rs67376798</i> | <i>rs396991</i>    | <i>rs2070744</i>  | <i>rs9514091</i>  | <i>rs1142345</i>  | <i>rs518329</i>    |
| <i>rs7921977</i>  | <i>rs1048943</i>  | <i>rs1801265</i>  | <i>rs2297480</i>   | <i>rs1800566</i>  | <i>rs1051266</i>  | <i>rs1800460</i>  | <i>rs1695</i>      |
| <i>rs2227310</i>  | <i>rs1056836</i>  | <i>rs55886062</i> | <i>rs1736557</i>   | <i>rs1143684</i>  | <i>rs11231825</i> | <i>rs12201199</i> | <i>rs885004</i>    |
| <i>rs12415607</i> | <i>rs3745274</i>  | <i>rs1801158</i>  | <i>rs12613732</i>  | <i>rs10932125</i> | <i>rs12210538</i> | <i>rs34489327</i> | <i>rs4148323</i>   |
| <i>rs4353229</i>  | <i>rs3211371</i>  | <i>rs9981861</i>  | <i>rs9679162</i>   | <i>rs17626122</i> | <i>rs714368</i>   | <i>rs34743033</i> |                    |
| <i>rs1127687</i>  | <i>rs12721655</i> | <i>rs4444903</i>  | <i>rs1806201</i>   | <i>rs870995</i>   | <i>rs316019</i>   | <i>rs8175347</i>  |                    |

**Table S3: Sequencing parameters for Ion Torrent Sequencing with the Oncomine Myeloid Research Assay (reference genome: GRCh37)**

| Sample ID* | Total Nr Reads | Nr mapped reads | On target (%) | Mean coverage (min-max) | Uniformity of coverage (%) | Percentage of targeted bases# with coverage $\geq 500X$ |
|------------|----------------|-----------------|---------------|-------------------------|----------------------------|---------------------------------------------------------|
| 1          | 3,088,528      | 3,087,305       | 97.46         | 5,981 (41-14,067)       | 97.69                      | 99.37                                                   |
| 2          | 3,419,776      | 3,408,433       | 97.51         | 6,533 (18-27,202)       | 98.66                      | 99.45                                                   |
| 3          | 1,803,589      | 1,799,444       | 97.37         | 3,482 (10-5,953)        | 98.85                      | 99.41                                                   |
| 4          | 1,075,496      | 1,070,929       | 98.30         | 2,009 (3-5,063)         | 96.87                      | 96.04                                                   |
| 5          | 4,376,463      | 4,373,835       | 97.76         | 8,472 (106-10,800)      | 96.48                      | 99.45                                                   |
| 6          | 1,972,494      | 1,967,232       | 98.42         | 3,847 (67-8,203)        | 98.09                      | 99.22                                                   |
| 7          | 2,544,926      | 2,543,588       | 96.74         | 4,834 (44-8,136)        | 98.35                      | 99.42                                                   |
| 8          | 1,688,031      | 1,684,264       | 98.14         | 3,249 (34-8,576)        | 98.18                      | 98.61                                                   |
| 9          | 2,385,941      | 2,379,140       | 98.36         | 4,660 (59-8,899)        | 98.81                      | 99.22                                                   |
| 10         | ND             | ND              | ND            | ND                      | ND                         | ND                                                      |
| 11         | 4,030,479      | 4,021,159       | 99.24         | 7,971 (55-15,906)       | 98.34                      | 99.23                                                   |
| 12         | 1,696,798      | 1,693,474       | 98.12         | 3,265 (8-7,174)         | 98.71                      | 99.01                                                   |
| 13         | 1,789,935      | 1,785,899       | 97.75         | 3,469 (13-6,136)        | 98.94                      | 99.44                                                   |
| 14         | 3,102,671      | 3,095,967       | 98.02         | 6,016 (14-10,300)       | 98.87                      | 99.44                                                   |
| 15         | ND             | ND              | ND            | ND                      | ND                         | ND                                                      |
| 16         | ND             | ND              | ND            | ND                      | ND                         | ND                                                      |

\*Sample ID according to Table 2 of the main manuscript.

#Targeted bases consist of bases amplified with the commercially available Oncomine Myeloid Research Assay

ND: not done.

**Table S4: Sequencing parameters for Ion Torrent Sequencing with the custom Myelo-Panel (reference genome: GRCh38)**

| Sample ID* | Total Nr Reads | Nr mapped reads | On target (%) | Mean coverage (min-max) | Uniformity of coverage (%) | Percentage of targeted bases# with coverage $\geq 500X$ |
|------------|----------------|-----------------|---------------|-------------------------|----------------------------|---------------------------------------------------------|
| 1T         | 10,799,016     | 10,747,798      | 98.46         | 1,448 (1-4,013)         | 95.87                      | 92.14                                                   |
| 1N         | 4,310,982      | 4,288,725       | 74.09         | 437.1 (1-4,976)         | 55.15                      | 54.88                                                   |
| 2T         | 11,534,090     | 11,473,171      | 98.52         | 1,552 (1-4,059)         | 96.29                      | 93.84                                                   |
| 2N         | 6,886,552      | 6,850,150       | 86.71         | 817,3 (1-3,362)         | 95.15                      | 73.36                                                   |
| 3T         | 11,437,967     | 11,389,263      | 98.72         | 1,550 (1-4,154)         | 95.90                      | 93.23                                                   |
| 3N         | 7,320,156      | 7,286,553       | 92.28         | 925.2 (1-3,147)         | 95.51                      | 80.13                                                   |
| 4T         | 12,761,980     | 12,704,142      | 98.71         | 1,726 (1-4,619)         | 95.98                      | 94.06                                                   |
| 4N         | 7,916,747      | 7,875,735       | 91.86         | 898.9 (1-2,968)         | 95.55                      | 83.57                                                   |
| 5T         | 12,985,143     | 12,918,463      | 98.33         | 1,732 (1-5,034)         | 95.59                      | 93.41                                                   |
| 5N         | 9,476,323      | 9,401,385       | 60.76         | 778.9 (1-3,524)         | 95.02                      | 70.60                                                   |

\*Sample ID according to Table 5 of the main manuscript.

#Targeted bases consist of bases amplified by 7296 custom Amplicons covering the coding regions of the 255 genes included in our custom Myeloid-panel

T: Tumor, peripheral blood; N: Normal, buccal DNA.
